# Supplementary material for: A reusable, reagent-less free chlorine sensor using gold thin film electrode
Source: Royal Society of Chemistry journal article supplement (doi:10.1039/d1an00038a), 2021-01-01
Supplement: d1an00038a1.pdf [file d1an00038a1.pdf]

## Electronic Supplementary Information

### **A reusable, reagent-less free chlorine sensor using gold thin film electrode**

Arif U. Alam,<sup>†</sup> Dennis Clyne,<sup>†</sup> Will Lush<sup>‡</sup>, and M. Jamal Deen<sup>†,\*</sup>

<sup>†</sup>Electrical and Computer Engineering, McMaster University, 1280 Main St. W., Hamilton, ON, L8S 4K1, Canada

<sup>‡</sup>Environmental Bio-Detection Products Inc., 735 Griffith Ct, Burlington, ON L7L 5R9

*KEYWORDS: Electrochemical sensing, gold thin film, electroanalysis, amperometric detection, free chlorine*

### pH dependence of the free chlorine sensor

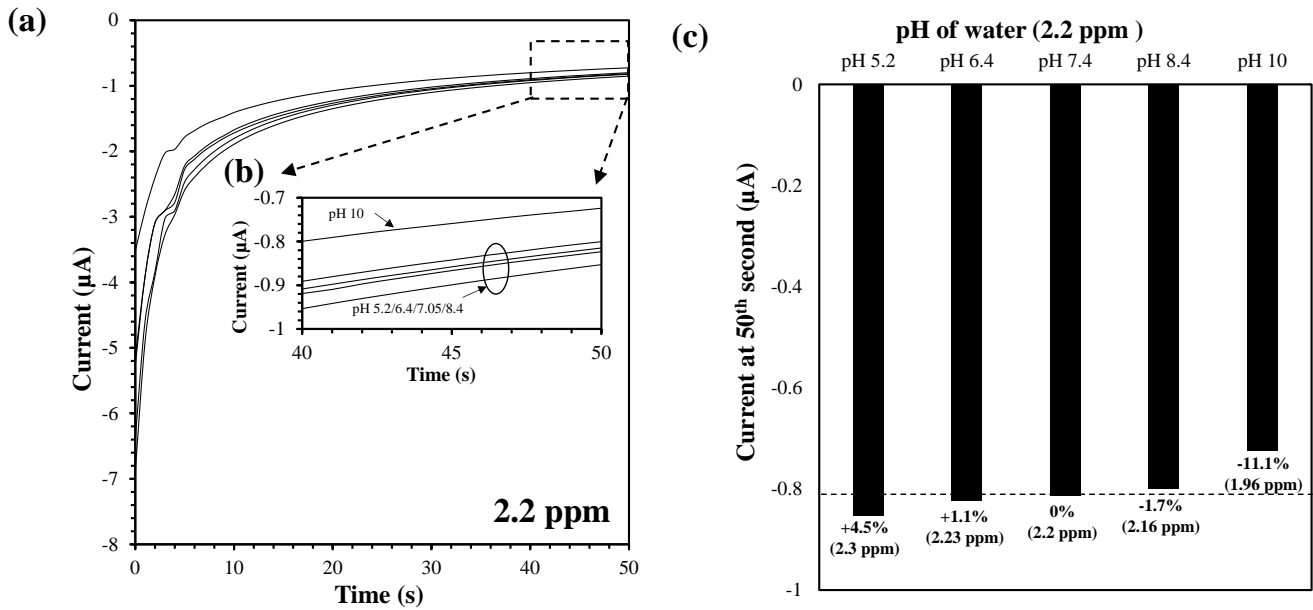

**Fig. S1:** (a) Chronoamperometric response with water of fixed concentration of 2.2 ppm free chlorine in different adjusted pH level. (b) Detailed view of the chronoamperometric response between 40 to 50 s. (c) Bar chart of the current response at 50<sup>th</sup> second from chronoamperometric response to water containing 2.2 ppm free chlorine in different adjusted pH level, which allows to measure pH dependence of the free chlorine sensor at medium concentration (2.2 ppm).

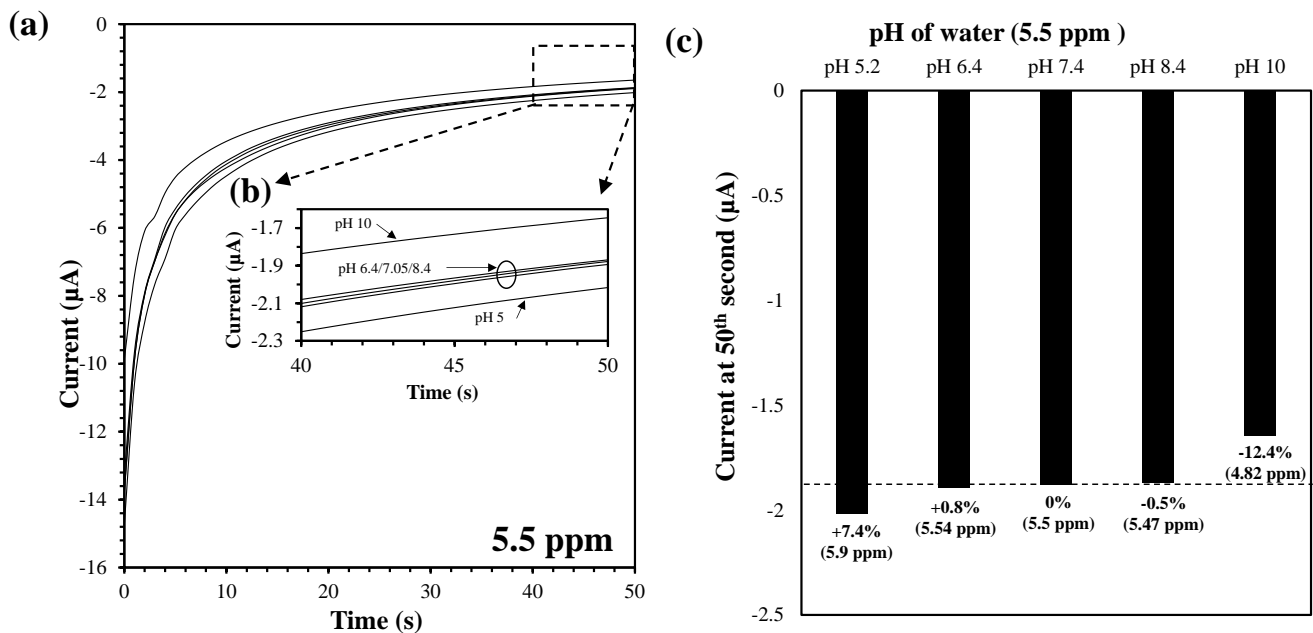

**Fig. S2:** (a) Chronoamperometric response with water of fixed concentration of 5.5 ppm free chlorine in different adjusted pH level. (b) Detailed view of the chronoamperometric response between 40 to 50 s. (c) Bar chart of the current response at 50<sup>th</sup> second from chronoamperometric response to water containing 5.5 ppm free chlorine in different adjusted pH level, which allows to measure pH dependence of the free chlorine sensor at high concentration (5.5 ppm).

### Temperature dependence of the free chlorine sensor

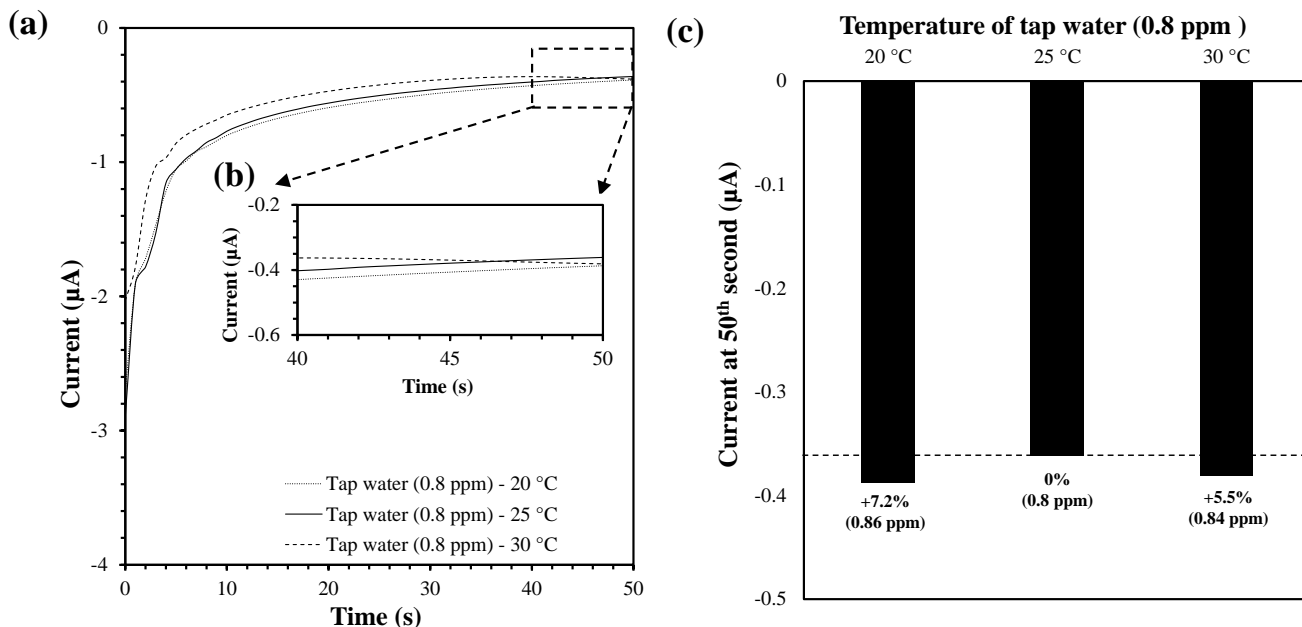

**Fig. S3:** (a) Chronoamperometric response with tap water of fixed concentration of 0.8 ppm free chlorine in different temperature. (b) Detailed view of the chronoamperometric response between 40 to 50 s. (c) Bar chart of the current response at 50<sup>th</sup> second from chronoamperometric response to water containing 0.8 ppm free chlorine in different temperature, which allows to measure temperature dependence of the free chlorine sensor.
